# Supplementary material for: Di-pyridyl organic cation directed hybrid cuprous halogenides: syntheses, crystal structures and photochromism and photocatalysis
Source: Royal Society of Chemistry journal article supplement (doi:10.1039/c7dt00262a), 2017-01-01
Supplement: c7dt00262a1.pdf [file c7dt00262a1.pdf]

# Di-pyridyl Organic Cation Directed Hybrid Cuprous Halogenides: Syntheses, Crystal Structures and Photochromism and Photocatalysis

Xiao-Wu Lei,\* Cheng-Yang Yue,\* Sai Wang, Hui Gao, Wei Wang, Ning Wang, Yun-Dong Yin

**Supporting Information**

**Table S1.** Comparison of Crystal Data of Compounds **1a** and **1b**.

| Compound                                                                                          | <b>1a</b>                                                                      | <b>1b</b>                                                                      |
|---------------------------------------------------------------------------------------------------|--------------------------------------------------------------------------------|--------------------------------------------------------------------------------|
| chemical formula                                                                                  | C <sub>26</sub> N <sub>4</sub> H <sub>34</sub> OCu <sub>4</sub> I <sub>8</sub> | C <sub>26</sub> N <sub>4</sub> H <sub>34</sub> OCu <sub>4</sub> I <sub>8</sub> |
| fw                                                                                                | 1687.93                                                                        | 1687.93                                                                        |
| Space group                                                                                       | C2/c (No. 15)                                                                  | C2/c (No. 15)                                                                  |
| <i>a</i> /Å                                                                                       | 14.7211(8)                                                                     | 14.713(2)                                                                      |
| <i>b</i> /Å                                                                                       | 18.6474(11)                                                                    | 18.652(3)                                                                      |
| <i>c</i> /Å                                                                                       | 29.9786(17)                                                                    | 29.986(4)                                                                      |
| $\beta$ /°                                                                                        | 91.4940(10)                                                                    | 91.489(2)                                                                      |
| <i>V</i> (Å <sup>3</sup> )                                                                        | 8226.6(8)                                                                      | 8226(2)                                                                        |
| <i>Z</i>                                                                                          | 8                                                                              | 8                                                                              |
| <i>D</i> <sub>calcd</sub> (g·cm <sup>-3</sup> )                                                   | 2.726                                                                          | 2.719                                                                          |
| Temp (K)                                                                                          | 293(2)                                                                         | 293(2)                                                                         |
| $\mu$ (mm <sup>-1</sup> )                                                                         | 8.070                                                                          | 8.070                                                                          |
| <i>F</i> (000)                                                                                    | 6128                                                                           | 6096                                                                           |
| Reflections collected                                                                             | 47342                                                                          | 46601                                                                          |
| Unique reflections                                                                                | 9504                                                                           | 9504                                                                           |
| Reflections ( <i>I</i> >2 $\sigma$ ( <i>I</i> ))                                                  | 8427                                                                           | 8147                                                                           |
| GOF on <i>F</i> <sup>2</sup>                                                                      | 1.034                                                                          | 1.067                                                                          |
| <i>R</i> <sub>1</sub> , <i>wR</i> <sub>2</sub> ( <i>I</i> > 2 $\sigma$ ( <i>I</i> )) <sup>a</sup> | 0.0281/0.0663                                                                  | 0.0359/0.0831                                                                  |
| <i>R</i> <sub>1</sub> , <i>wR</i> <sub>2</sub> (all data)                                         | 0.0342/0.0688                                                                  | 0.0451/0.0870                                                                  |
| $\Delta\rho_{\max}$ (e/Å <sup>3</sup> )                                                           | 1.736                                                                          | 1.633                                                                          |
| $\Delta\rho_{\min}$ (e/Å <sup>3</sup> )                                                           | -2.039                                                                         | -2.107                                                                         |

---

<sup>a</sup> $R_1 = \sum ||F_o| - |F_c|| / \sum |F_o|$ ,  $wR_2 = \{\sum w[(F_o)^2 - (F_c)^2]^2 / \sum w[(F_o)^2]\}^{1/2}$

**Table S2.** Selected bond lengths (Å) for compounds **1a** and **1b**.

| bonds       | <b>1a</b>  | <b>1b</b>  | bonds       | <b>1a</b>  | <b>1b</b>  |
|-------------|------------|------------|-------------|------------|------------|
| Cu(1)-I(1)  | 2.6180(7)  | 2.6187(10) | Cu(3)-I(2)  | 2.5603(7)  | 2.5590(10) |
| Cu(1)-I(6)  | 2.6564(8)  | 2.6560(10) | Cu(3)-I(5)  | 2.6416(8)  | 2.6406(10) |
| Cu(1)-I(2)  | 2.6828(7)  | 2.6820(10) | Cu(3)-I(7)  | 2.7503(9)  | 2.7515(12) |
| Cu(1)-I(3)  | 2.7213(8)  | 2.7212(10) | Cu(3)-I(3)  | 2.7961(10) | 2.7967(13) |
| Cu(2)-I(4)  | 2.6062(7)  | 2.6058(10) | Cu(4)-I(8)  | 2.5104(8)  | 2.5084(11) |
| Cu(2)-I(1)  | 2.6747(8)  | 2.6757(10) | Cu(4)-I(5)  | 2.5877(9)  | 2.5879(12) |
| Cu(2)-I(7)  | 2.7370(8)  | 2.7367(11) | Cu(4)-I(7)  | 2.7773(10) | 2.7785(13) |
| Cu(2)-I(2)  | 2.7551(8)  | 2.7549(10) | Cu(4)-I(3)  | 3.0300(12) | 3.0292(16) |
| Cu(1)-Cu(3) | 2.8454(10) | 2.8447(14) | Cu(2)-Cu(3) | 2.7382(10) | 2.7383(13) |
| Cu(1)-Cu(2) | 2.9480(10) | 2.9494(13) | Cu(3)-Cu(4) | 2.5121(10) | 2.5125(13) |

**Table S3.** Selected bond lengths (Å) for compound **2**.

|            |           |              |            |
|------------|-----------|--------------|------------|
| Cu(1)-I(1) | 2.5951(8) | Cu(2)-I(2)   | 2.7192(9)  |
| Cu(1)-I(2) | 2.7199(8) | Cu(2)-I(2)#1 | 2.7696(10) |
| Cu(1)-I(3) | 2.6510(8) | Cu(2)-I(3)   | 2.6204(8)  |
| Cu(1)-I(4) | 2.6855(9) | Cu(2)-I(4)#2 | 2.6649(9)  |

Symmetry transformations used to generate equivalent atoms: #1  $x, -y+3/2, z-1/2$ , #2  $x, -y+3/2, z+1/2$ .

**Table S4.** Selected bond lengths (Å) for compound **3**.

|               |            |                |            |
|---------------|------------|----------------|------------|
| Cu(1)-I(1)#2  | 2.5888(12) | Cu(4)-I(8)     | 2.6387(11) |
| Cu(1)-I(8)    | 2.6260(12) | Cu(4)-I(5)     | 2.6400(11) |
| Cu(1)-I(4)    | 2.6490(12) | Cu(4)-I(2)     | 2.6653(11) |
| Cu(1)-I(6)    | 2.8914(14) | Cu(4)-I(7)     | 2.6662(10) |
| Cu(2)-I(1)    | 2.5982(11) | Cu(5)-I(2)#1   | 2.554(3)   |
| Cu(2)-I(5)    | 2.6409(11) | Cu(5)-I(3)     | 2.602(3)   |
| Cu(2)-I(7)    | 2.6895(11) | Cu(5)-I(2)     | 2.696(3)   |
| Cu(2)-I(6)#3  | 2.7638(11) | Cu(5)-I(4)     | 2.855(3)   |
| Cu(3)-I(5)#2  | 2.6417(11) | Cu(6A)-I(4)    | 2.5714(18) |
| Cu(3)-I(7)    | 2.6671(11) | Cu(6A)-I(6)    | 2.711(2)   |
| Cu(3)-I(6)    | 2.6773(11) | Cu(6A)-I(3)    | 2.718(2)   |
| Cu(3)-I(8)    | 2.6896(11) | Cu(6A)-I(2)    | 2.7361(19) |
| Cu(3)-Cu(2)#2 | 2.8493(14) | Cu(1)-Cu(2)#2  | 2.9622(15) |
| Cu(3)-Cu(1)   | 2.9943(16) | Cu(5)-Cu(6A)#1 | 2.882(3)   |
| Cu(4)-Cu(3)   | 2.7267(13) | Cu(6A)-Cu(1)   | 2.986(2)   |
| Cu(4)-Cu(2)   | 2.7731(14) |                |            |

Symmetry transformations used to generate equivalent atoms: #1 -x, -y, z; #2 -x, -y+1/2, z+1/2; #3 -x, -y+1/2, z-1/2.

**Table S5.** Selected bond lengths (Å) for compound 4.

|               |          |               |           |
|---------------|----------|---------------|-----------|
| Cu(1)-Br(1)   | 2.461(2) | Cu(4)-Br(2)#2 | 2.432(2)  |
| Cu(1)-Br(5)   | 2.486(2) | Cu(4)-Br(4)   | 2.506(2)  |
| Cu(1)-Br(4)   | 2.502(2) | Cu(4)-Br(8)   | 2.546(2)  |
| Cu(1)-Br(8)   | 2.609(2) | Cu(4)-Br(7)#2 | 2.694(2)  |
| Cu(2)-Br(4)#1 | 2.484(2) | Cu(5)-Br(6)   | 2.461(3)  |
| Cu(2)-Br(8)   | 2.485(3) | Cu(5)-Br(7)   | 2.578(5)  |
| Cu(2)-Br(7)   | 2.557(3) | Cu(5)-Br(1)   | 2.586(4)  |
| Cu(2)-Br(5)   | 2.619(3) | Cu(5)-Br(3)   | 2.639(18) |
| Cu(3)-Br(2)   | 2.436(2) | Cu(6)-Br(1)   | 2.513(7)  |
| Cu(3)-Br(5)   | 2.455(2) | Cu(6)-Br(3)#3 | 2.567(10) |
| Cu(3)-Br(6)   | 2.502(2) | Cu(6)-Br(3)   | 2.622(10) |
| Cu(3)-Br(7)   | 2.913(3) | Cu(6)-Br(6)   | 2.843(8)  |
| Cu(1)-Cu(2)   | 2.723(3) | Cu(3)-Cu(5)   | 2.890(4)  |
| Cu(1)-Cu(4)   | 2.772(3) | Cu(3)-Cu(4)#1 | 2.955(3)  |
| Cu(2)-Cu(4)#1 | 2.798(3) | Cu(5)-Cu(6)#3 | 2.878(8)  |

Symmetry transformations used to generate equivalent atoms: #1 -x, -y+1/2, z-1/2; #2 -x, -y+1/2, z+1/2; #3 -x, -y+1, z.

**Table S6.** The hydrogen bonds in compounds 1-4.

| D-H...A              | d(D-H) | d(H...A) | d(D...A) | <(DHA) |
|----------------------|--------|----------|----------|--------|
| <b>1</b>             |        |          |          |        |
| N(1)-H(1N)...I(4)    | 0.86   | 2.77     | 3.5016   | 143    |
| N(2)-H(2N)...I(6)    | 0.86   | 2.73     | 3.5045   | 150    |
| N(3)-H(3)...I(8)     | 0.86   | 2.72     | 3.5271   | 156    |
| C(6)-H(6)...I(5)     | 0.93   | 3.01     | 3.7357   | 137    |
| C(14)-H(14)...I(3)   | 0.93   | 3.01     | 3.8911   | 158    |
| <b>2</b>             |        |          |          |        |
| C(1)-H(1)...I(3)     | 0.93   | 2.96     | 3.7843   | 149    |
| <b>3</b>             |        |          |          |        |
| N(2)-H(2)...I(8)     | 0.86   | 3.00     | 3.7809   | 153    |
| C(1)-H(1A)...I(8)    | 0.93   | 2.99     | 3.7985   | 147    |
| C(6)-H(6)...I(6)     | 0.93   | 2.98     | 3.7318   | 139    |
| C(12)-H(12A)...I(5)  | 0.97   | 3.01     | 3.9265   | 158    |
| <b>4</b>             |        |          |          |        |
| N(1)-H(1)...Br(5)    | 0.86   | 2.76     | 3.5346   | 151    |
| C(1)-H(1A)...Br(5)   | 0.93   | 2.76     | 3.5647   | 146    |
| C(10)-H(10)...Br(7)  | 0.93   | 2.82     | 3.5609   | 137    |
| C(12)-H(12A)...Br(4) | 0.97   | 2.85     | 3.7682   | 159    |

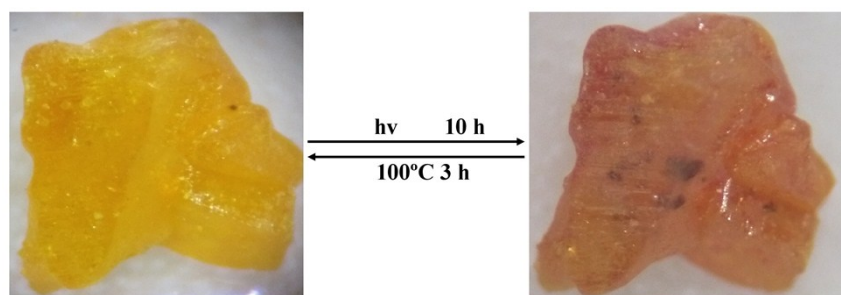

**Fig. S1.** The photochromic behavior of compound **1**.

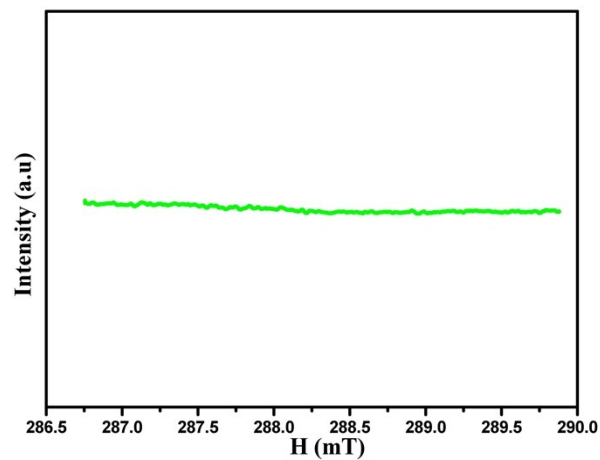

**Fig. S2.** EPR spectra for compound **1** after visible light irradiation.

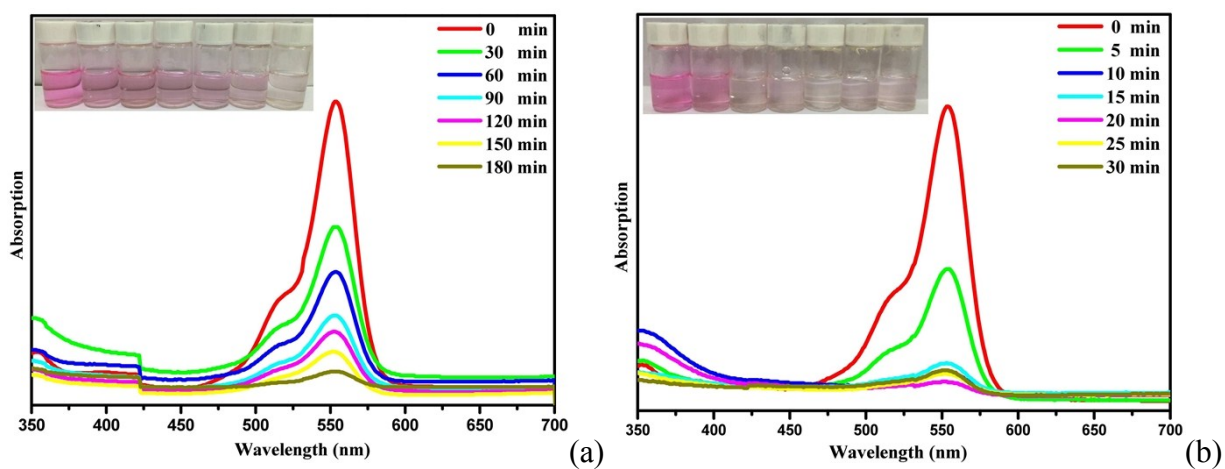

**Fig. S3** The absorption spectra of the RhB solution in the presence of compound **2** (a) and **3** (b) under the visible light irradiation.

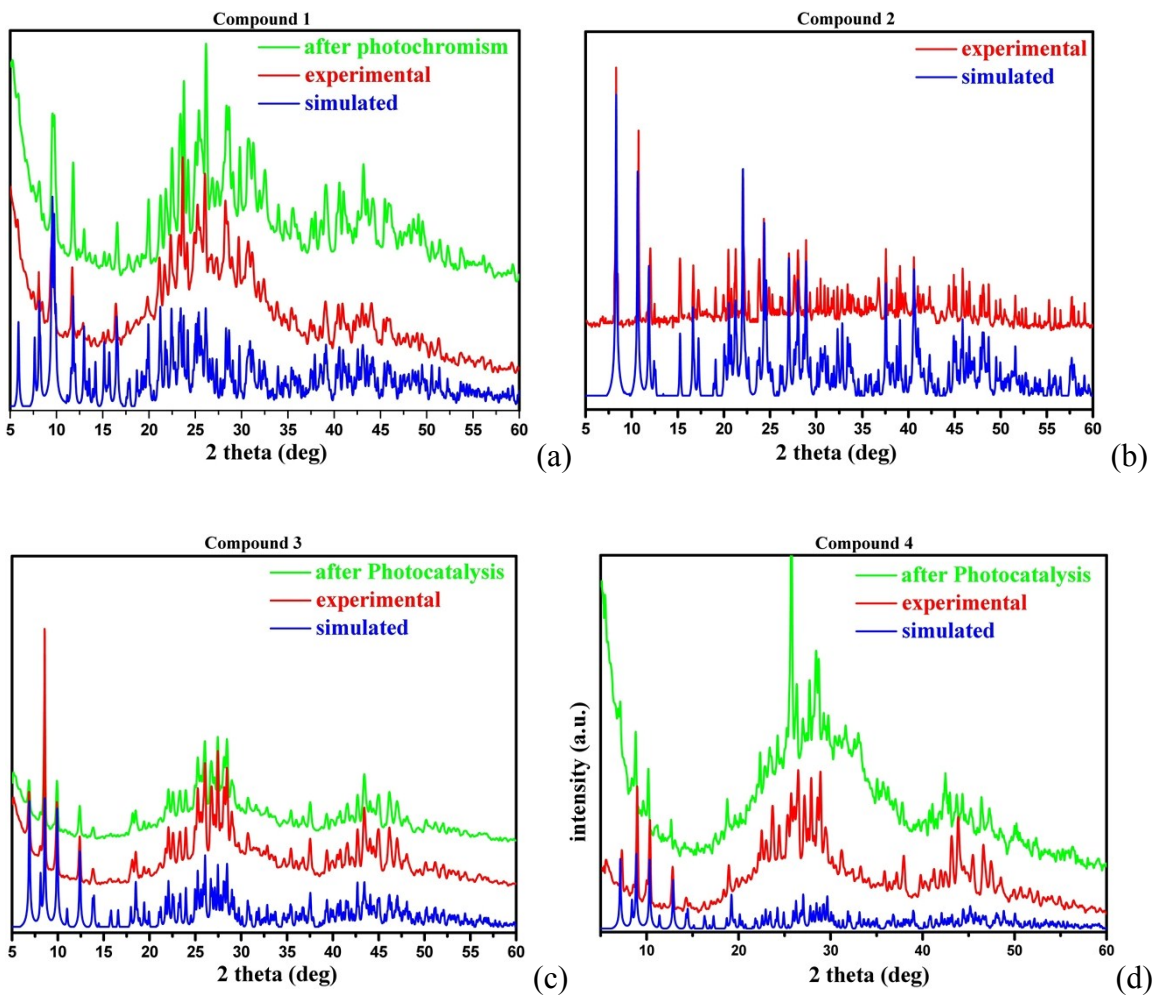

**Fig. S4.** Experimental and simulated XRD powder patterns for compounds **1** (a), **2** (b), **3** (c) and **4** (d).
